# Supplementary material for: Molecular Cloning, Expression Analyses, and Physiological Roles of Cathelicidins in the Bursa of Fabricius of the Japanese Quail, Coturnix japonica
Source: MDPI journal article supplement (doi:10.3390/antibiotics12081341), 2023-08-19
Supplement: s1 [file s1]

**Table S1.** Primer sequences used in this study

| Primer              | Sequence (5' to 3')         | Application                   |
|---------------------|-----------------------------|-------------------------------|
| CATH common forward | ATGCTGAGCTGCTGGGTGCT        | 3'-RACE                       |
| 3'-site adaptor     | CTGATCTAGAGGTACCGGATCC      | 3'-RACE                       |
| CATH-1 (F)          | GCTGTGGACTCCTACAACCAAC      | cRNA probe production for ISH |
| CATH-1 (R)          | TGATGACCAGCGGCAAGAC         | cRNA probe production for ISH |
| CATH-2 (F)          | CAGGCTGTGGACACCTACAAC       | cRNA probe production for ISH |
| CATH-2 (R)          | GCCCCATTTATTCACTCAGC        | cRNA probe production for ISH |
| CATH-3 (F)          | TGTGGACTCCTACAACCAACG       | cRNA probe production for ISH |
| CATH-3 (R)          | TGATGGCTTTGTAGAGGTTGATG     | cRNA probe production for ISH |
| M13 (F)             | GTAAAACGACGGCCAGT           | cRNA probe production for ISH |
| M13 (R)             | CAGGAAACAGCTATGAC           | cRNA probe production for ISH |
| CATH-1 (F)          | GGGCAATCAAGAGGAAGTGAG       | Real-time PCR                 |
| CATH-1 (R)          | CAGCAAAGACCTTTATTGGATGG     | Real-time PCR                 |
| CATH-2 (F)          | ATCAGCCTGAAGTGCAGAGACG      | Real-time PCR                 |
| CATH-2 (R)          | TCACTCAGCCAAAGCGTGAG        | Real-time PCR                 |
| CATH-3 (F)          | ATGGCTGATCCTGTCCGTGT        | Real-time PCR                 |
| CATH-3 (R)          | CTGATGGCTTTGTAGAGGTTGATG    | Real-time PCR                 |
| $\beta$ -actin (F)  | GAACCCCAAAGCCAACAACAGAG     | Real-time PCR                 |
| $\beta$ -actin (R)  | CCATCACCAGAGTCCATCACA       | Real-time PCR                 |
| TLR4 (F)            | ACGTCACCACTATTCGGTTGG       | RT-PCR                        |
| TLR4 (R)            | AAGGAGGAGAAAGACAGGGTAGGT    | RT-PCR                        |
| TLR2t1 (F)          | ACTGGTTCAGAACTCTACTCTTCC    | RT-PCR                        |
| TLR2t1 (R)          | AGATTACTTATATATCTTGCAGCCTGT | RT-PCR                        |
| TLR2t2 (F)          | TGAGAATTATGTCTTCCTCTTTTCGC  | RT-PCR                        |
| TLR2t2 (R)          | GATGAAACAAGCTTTTACCTGTCATT  | RT-PCR                        |
| GR (F)              | GCTCTTCTCCATCCACAACCTC      | RT-PCR                        |
| GR (R)              | CCACTTGCCGTCCTCCTAAC        | RT-PCR                        |
| FFAR2 (F)           | GCCCCATAGCAAACCTTCT         | RT-PCR                        |
| FFAR2 (R)           | GGGCAGCCATAAAGAGAG          | RT-PCR                        |

F, forward primer; R, reverse primes.
